# Supplementary material
Source: publisher figshare collection journal article supplement (https://acs.figshare.com/ndownloader/files/12552356)
Supplement: Supplementary file 1 [file 12552356]

# Supporting Information

## ***Ab Initio* Structure Determination of Cu<sub>2-x</sub>Te Plasmonic Nanocrystals by Precession-Assisted Electron Diffraction Tomography and HAADF-STEM Imaging**

Enrico Mugnaioli<sup>a</sup>, Mauro Gemmi<sup>a</sup>, Renyong Tu<sup>b,c</sup>, Jeremy David<sup>a,d</sup>, Giovanni Berton<sup>b,e</sup>, Roberto Gaspari<sup>b</sup>, Luca De Trizio<sup>b</sup>, Liberato Manna<sup>b</sup>

<sup>a</sup> *Center for Nanotechnology Innovation@NEST, Istituto Italiano di Tecnologia (IIT), Piazza San Silvestro 12, 56127 Pisa, Italy*

<sup>b</sup> *Department of Nanochemistry, Istituto Italiano di Tecnologia (IIT), via Morego 30, 16163 Genova, Italy*

<sup>c</sup> *Department of Chemistry, Tsinghua University, Beijing 100084, China*

<sup>d</sup> *Catalan Institute of Nanoscience and Nanotechnology (ICN2), CSIC and BIST, Campus UAB, Bellaterra, 08193 Barcelona, Spain*

<sup>e</sup> *IMEM – CNR, Institute of Materials for Electronics and Magnetism, Parco Area delle Scienze 37/A, I-43124 Parma, Italy*

**Table S1.** EDS measurements performed on the same NSs used for EDT data collections. Measurements were done on 13 single NSs by a Bruker EDS detector XFlash6T-60 mounted in a Zeiss Libra120 TEM.

| <b>Spectrum</b>    | <b>Cu-K (at. %)</b> | <b>Te-L (at. %)</b> |
|--------------------|---------------------|---------------------|
| NS1                | 56.80               | 43.2                |
| NS2                | 54.32               | 45.68               |
| NS3                | 63.83               | 36.17               |
| NS4                | 58.21               | 41.79               |
| NS5                | 57.17               | 42.83               |
| NS6                | 60.07               | 39.93               |
| NS7                | 58.15               | 41.85               |
| NS8                | 58.40               | 41.60               |
| NS9                | 58.71               | 41.29               |
| NS10               | 54.47               | 45.53               |
| NS11               | 61.72               | 38.28               |
| NS12               | 56.54               | 43.46               |
| NS13               | 56.87               | 43.13               |
| Average            | 58.25               | 41.75               |
| Standard deviation | 2.38                | 2.38                |

**Table S2.** Structural and experimental details regarding the structure solution of Cu<sub>1.5</sub>Te phase. \*: cell parameters refined by Rietveld refinement on XRPD data. \*\*: agreement parameters are rather high for this structure, even for EDT standard. This can be explained with the fact that at least part of the Cu positions determined are in fact partially occupied and there must be other low occupied sites assigned as vacancies. Moreover, surface effects, twinning and stacking disorder are expected to significantly deteriorate the agreement parameters for this sample.

| <b>Crystallographic details</b>                           |                                    |
|-----------------------------------------------------------|------------------------------------|
| <b>Unit cell content<br/>(as determined by EDT)</b>       | Cu <sub>124</sub> Te <sub>96</sub> |
| <b>Space group</b>                                        | <i>P</i> 222 <sub>1</sub>          |
| <b>a, Å</b>                                               | 7.544(3)*                          |
| <b>b, Å</b>                                               | 22.622(7)*                         |
| <b>c, Å</b>                                               | 29.797(4)*                         |
| <b>Cell volume, Å<sup>3</sup></b>                         | 5085(3)*                           |
|                                                           |                                    |
| <b>EDT data collection</b>                                |                                    |
| <b>Cell volume, Å<sup>3</sup></b>                         | 5060                               |
| <b>Tilt range, °</b>                                      | 130                                |
| <b>Tilt step, °</b>                                       | 1                                  |
| <b>Precession semi-angle, °</b>                           | 1                                  |
|                                                           |                                    |
| <b><i>Ab initio</i> structure determination (SIR2014)</b> |                                    |
| <b>Data resolution, Å</b>                                 | 0.9                                |
| <b>N° sampled reflections</b>                             | 12707                              |
| <b>N° independent reflections</b>                         | 3192                               |
| <b>Independent reflection coverage, %</b>                 | 77                                 |
| <b>R<sub>sym</sub>, %</b>                                 | 27.04                              |
| <b>R<sub>SIR</sub>, %</b>                                 | 34.61**                            |
|                                                           |                                    |

| Least-squares refinement (SHELXL)    |         |
|--------------------------------------|---------|
| <b>Data resolution, Å</b>            | 0.9     |
| <b><i>N</i>° reflections &gt; 4σ</b> | 3702    |
| <b><i>R</i><sub>int</sub>, %</b>     | 36.82   |
| <b><i>R</i>1 (4σ), %</b>             | 46.55** |
| <b><i>Goof</i></b>                   | 2.660** |

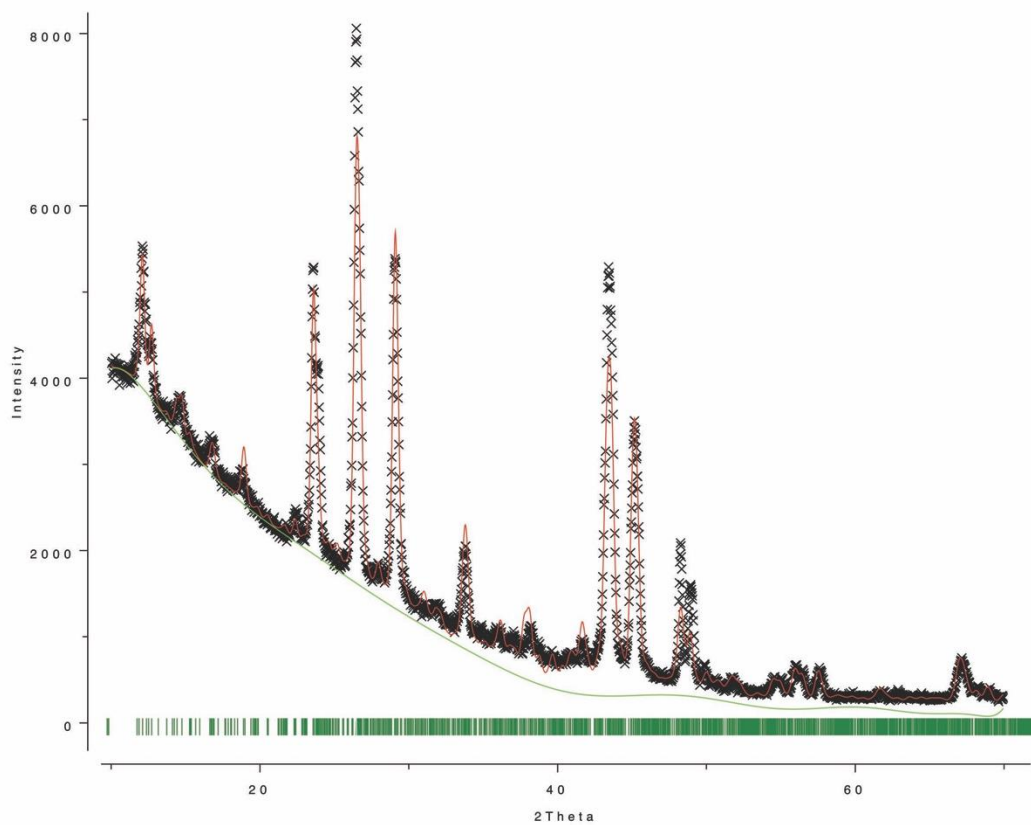

**Figure S1.** Rietveld fit obtained with the structure solved with EDT data. Only the unit cell, the profile and background parameters have been refined.

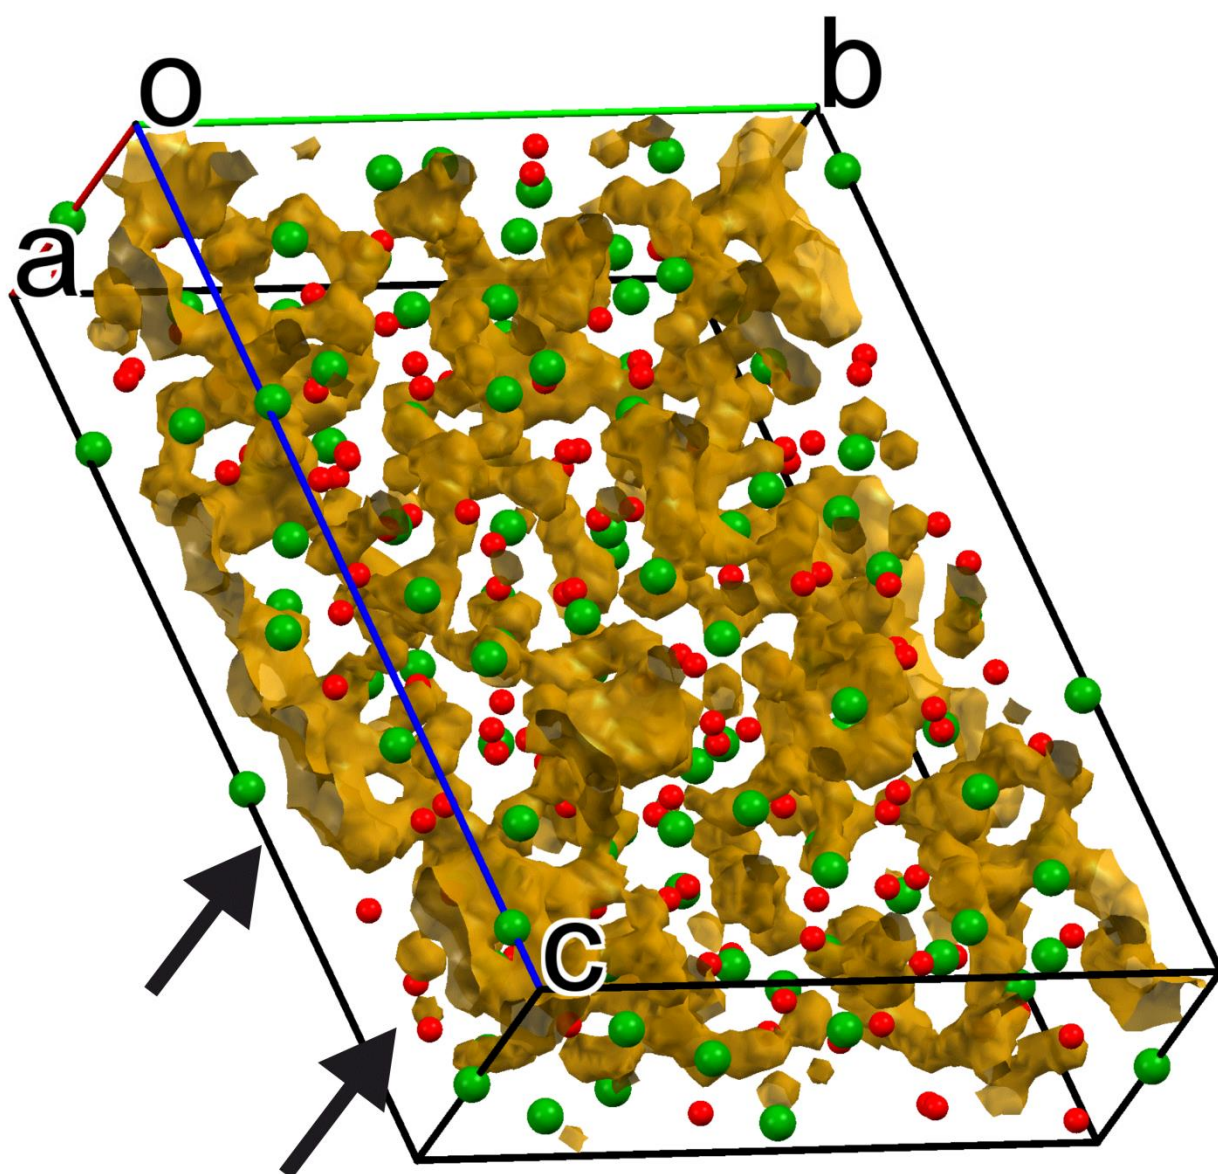

**Figure S2.** Low-density areas in  $\text{Cu}_{1.5}\text{Te}$  structure. The arrow marks one of the low-density areas parallel to  $(100)$  and responsible for the up-up-down-down pattern in  $[010]$  HAADF-STEM images.

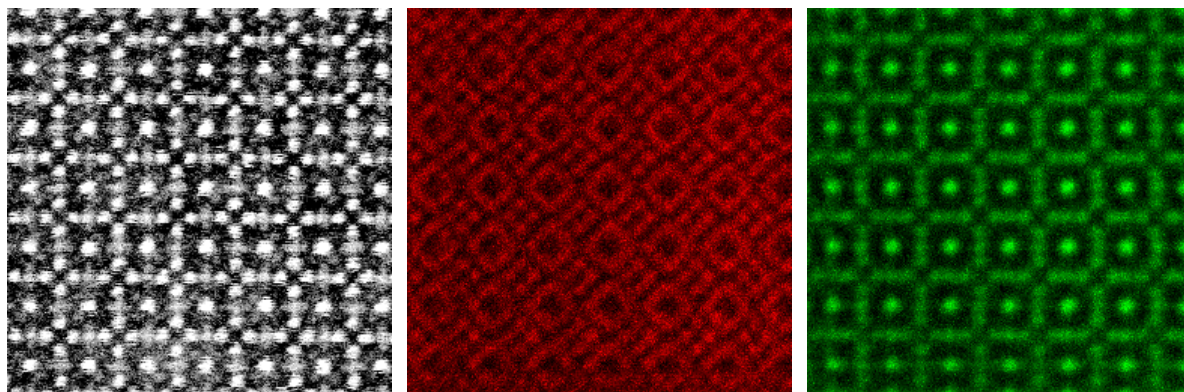

**Figure S3.** ADF image, together with the Cu-K EDS map (red) and Te-L EDS map (green)
